# Supplementary material
Source: publisher figshare collection journal article supplement (https://acs.figshare.com/ndownloader/files/5163094)
Supplement: Supplementary file 1 [file 5163094]

# A New Route to Organoboron Polymers via Highly Selective Polymer Modification Reactions

Yang Qin, Guanglou Cheng, Obianuju Achara, Kshitij Parab, and Frieder Jäkle\*

Department of Chemistry, Rutgers University-Newark, 73 Warren Street, Newark, NJ 07102

## Supplementary Material

The labeling schemes on the right are used for  $^1\text{H}$  and  $^{13}\text{C}$  NMR assignments.

The abbreviations Ph, Th, and Pf are used for phenyl, 2-thienyl, and pentafluorophenyl, respectively.

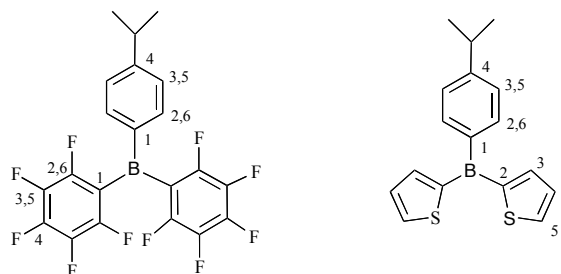

## Synthesis and Spectroscopic Data of Cumene Model Compounds

**Synthesis of 4-Trimethylsilylcumene<sup>1</sup>.** 4-Bromocumene (10.44 g, 52.4 mmol) was dissolved in 200 ml diethyl ether at 0 °C and *n*-BuLi (36 ml, 1.6M in hexanes, 58 mmol) was added dropwise. The mixture was allowed to warm to room temperature, stirred for 2 h and then cooled down to -78 °C. Neat Me<sub>3</sub>SiCl (8.6 ml, 68 mmol) was added dropwise, and the mixture was warmed to room temperature, stirred overnight, and then poured into ice water containing 1% NaOH. After standard workup and removal of all volatile components under vacuum at room temperature, the product was distilled at 43 °C under high vacuum. 4-Trimethylsilylcumene was obtained as a colorless liquid (7.7 g, 76%).  $^1\text{H}$  NMR (399.952 MHz, C<sub>6</sub>D<sub>6</sub>):  $\delta$  = 7.47 (d,  $^3J_{\text{HH}}$  = 8.0 Hz, 2H, Ph-H2,6), 7.16 (d,  $^3J_{\text{HH}}$  = 8.0 Hz, 2H, Ph-H3,5), 2.73 (septet,  $^3J_{\text{HH}}$  = 7.2 Hz, 1H, CH[CH<sub>3</sub>]<sub>2</sub>), 1.16 (d,  $^3J_{\text{HH}}$  = 7.2 Hz, 6H, CH[CH<sub>3</sub>]<sub>2</sub>), 0.24 (s, 9H, Si[CH<sub>3</sub>]<sub>3</sub>);  $^{13}\text{C}$  NMR (100.564 MHz, C<sub>6</sub>D<sub>6</sub>):  $\delta$  = 149.6 (Ph-C4), 137.3 (Ph-C1), 133.8 (Ph-C2,6), 126.3 (Ph-C3,5), 34.4 (CH[CH<sub>3</sub>]<sub>2</sub>), 24.1 (CH[CH<sub>3</sub>]<sub>2</sub>), -0.9 (Si[CH<sub>3</sub>]<sub>3</sub>);  $^{29}\text{Si}$  NMR (79.4 MHz, C<sub>6</sub>D<sub>6</sub>):  $\delta$  = -4.3; GC-MS (*t* = 5.7 min): *m/z*: 192 [*M*<sup>+</sup>], 177 [*M*<sup>+</sup>-CH<sub>3</sub>].

**Synthesis of 4-Dibromoborylcumene.** A solution of BBr<sub>3</sub> (4.85 g, 19.4 mmol) in 5 ml CH<sub>2</sub>Cl<sub>2</sub> was added dropwise to a solution of 4-trimethylsilylcumene (3.38 g, 17.6 mmol) in 10 ml CH<sub>2</sub>Cl<sub>2</sub>. The reaction mixture was stirred for 2 h, and all volatile material was subsequently

removed under reduced pressure ( $10^{-3}$  torr). The crude product was distilled at 56 °C under high vacuum to give 4-dibromoborylcumene as a colorless liquid with a yield of 4.88 g (96%).  $^1\text{H}$  NMR (399.952 MHz,  $\text{C}_6\text{D}_6$ ):  $\delta$  = 8.08 (d,  $^3J_{\text{HH}}$  = 8.0 Hz, 2H, Ph-H2,6), 6.92 (d,  $^3J_{\text{HH}}$  = 8.0 Hz, 2H, Ph-H3,5), 2.53 (heptet,  $^3J_{\text{HH}}$  = 7.2 Hz, 1H,  $\text{CH}[\text{CH}_3]_2$ ), 0.99 (d,  $^3J_{\text{HH}}$  = 7.2 Hz, 6H,  $\text{CH}[\text{CH}_3]_2$ );  $^1\text{H}$  NMR (399.952 MHz,  $\text{CDCl}_3$ ):  $\delta$  = 8.07 (d,  $^3J_{\text{HH}}$  = 8.0 Hz, 2H, Ph-H2,6), 7.23 (d,  $^3J_{\text{HH}}$  = 8.0 Hz, 2H, Ph-H3,5), 2.87 (heptet,  $^3J_{\text{HH}}$  = 7.2 Hz, 1H,  $\text{CH}[\text{CH}_3]_2$ ), 1.19 (d,  $^3J_{\text{HH}}$  = 7.2 Hz, 6H,  $\text{CH}[\text{CH}_3]_2$ );  $^{13}\text{C}$  NMR (100.564 MHz,  $\text{C}_6\text{D}_6$ ):  $\delta$  = 157.2 (Ph-C4), 138.5 (Ph-C2,6), 126.6 (Ph-C3,5), 34.6 ( $\text{CH}[\text{CH}_3]_2$ ), 23.3 ( $\text{CH}[\text{CH}_3]_2$ ), Ph-C1 not observed;  $^{11}\text{B}$  NMR (160.370 MHz,  $\text{C}_6\text{D}_6$ ):  $\delta$  = 56 ( $w_{1/2}$  = 300 Hz); EI-MS (%):  $m/z$ : 290 [ $\text{M}^+$ ] (40), 275 [ $\text{M}^+ - \text{CH}_3$ ] (100); elemental analysis: calcd. C 37.30 H 3.83; found C 38.06 H 3.85.

**Synthesis of 4-Diethoxyborylcumene.** Neat  $\text{Me}_3\text{SiOEt}$  (0.65 ml, 4.2 mmol) was added dropwise to a solution of 4-dibromoborylcumene (0.50 g, 1.73 mmol) in  $\text{CH}_2\text{Cl}_2$  (10 ml) at room temperature. The mixture was stirred for 1 d, and all volatile material was subsequently removed under reduced pressure ( $10^{-3}$  torr). 4-Diethoxyborylcumene was obtained as a colorless liquid in a yield of 0.37 g (98%) with >95% spectroscopic purity as confirmed by  $^1\text{H}$  NMR analysis.  $^1\text{H}$  NMR (399.952 MHz,  $\text{C}_6\text{D}_6$ ):  $\delta$  = 7.75 (d,  $^3J_{\text{HH}}$  = 8.0 Hz, 2H, Ph-H2,6), 7.17 (d,  $^3J_{\text{HH}}$  = 8.0 Hz, 2H, Ph-H3,5), 4.02 (quartet,  $^3J_{\text{HH}}$  = 7.2 Hz, 4H,  $\text{OCH}_2\text{CH}_3$ ), 2.73 (heptet,  $^3J_{\text{HH}}$  = 7.2 Hz, 1H,  $\text{CH}[\text{CH}_3]_2$ ), 1.16 (d,  $^3J_{\text{HH}}$  = 7.2 Hz, 6H,  $\text{CH}[\text{CH}_3]_2$ ), 1.14 (t,  $^3J_{\text{HH}}$  = 7.2 Hz, 6H,  $\text{OCH}_2\text{CH}_3$ );  $^{13}\text{C}$  NMR (100.564 MHz,  $\text{C}_6\text{D}_6$ ):  $\delta$  = 150.4 (Ph-C4), 134.3 (Ph-C2,6), 131.0 (br, Ph-C1), 126.0 (Ph-C3,5), 60.2 ( $\text{OCH}_2\text{CH}_3$ ), 34.5 ( $\text{CH}[\text{CH}_3]_2$ ), 24.0 ( $\text{CH}[\text{CH}_3]_2$ ), 17.7 ( $\text{OCH}_2\text{CH}_3$ );  $^{11}\text{B}$  NMR (160.370 MHz,  $\text{C}_6\text{D}_6$ ):  $\delta$  = 28 ( $w_{1/2}$  = 450 Hz); GC-MS ( $t$  = 7.21 min):  $m/z$ : 220 [ $\text{M}^+$ ], 205 [ $\text{M}^+ - \text{CH}_3$ ], 175, 135; (due to partial hydrolysis on the GC-MS column an additional band for the boroxin ( $i\text{PrPhBO}$ )<sub>3</sub> is observed at a higher retention time of 14.8 min); elemental analysis: calcd. C 70.94 H 9.62; found C 69.98 H 9.50.

**Synthesis of 4-Bis(4'-bromobutoxy)borylcumene.** A solution of THF (1.6 ml, 20 mmol) in 5 ml  $\text{CH}_2\text{Cl}_2$  was added dropwise to a solution of 4-dibromoborylcumene (0.25 g, 0.86 mmol) in  $\text{CH}_2\text{Cl}_2$  (10 ml) at room temperature and the mixture was kept stirring for 2 h. All volatile material was removed under reduced pressure ( $10^{-3}$  torr). Distillation of the crude product at 90 °C under high vacuum gave 0.32 g (86%) 4-bis(4'-bromobutoxy)borylcumene as a colorless liquid.  $^1\text{H}$  NMR (399.952 MHz,  $\text{C}_6\text{D}_6$ ):  $\delta$  = 7.70 (d,  $^3J_{\text{HH}}$  = 8.0 Hz, 2H, Ph-H2,6), 7.20 (d,  $^3J_{\text{HH}}$  = 8.0 Hz, 2H, Ph-H3,5), 3.84 (t,  $^3J_{\text{HH}}$  = 6.4 Hz, 4H,  $\text{OCH}_2\text{CH}_2\text{CH}_2\text{CH}_2\text{Br}$ ), 2.96 (t,  $^3J_{\text{HH}}$  = 6.4 Hz, 4H,  $\text{OCH}_2\text{CH}_2\text{CH}_2\text{CH}_2\text{Br}$ ), 2.73 (septet,  $^3J_{\text{HH}}$  = 7.2 Hz, 1H,  $\text{CH}[\text{CH}_3]_2$ ), 1.62, 1.47 (m, 8H,  $\text{OCH}_2\text{CH}_2\text{CH}_2\text{CH}_2\text{Br}$ ), 1.16 (d,  $^3J_{\text{HH}}$  = 7.2 Hz, 6H,  $\text{CH}[\text{CH}_3]_2$ );  $^{13}\text{C}$  NMR (100.564 MHz,  $\text{C}_6\text{D}_6$ ):  $\delta$  = 150.7 (Ph-C4), 134.3 (Ph-C2,6), 131.0 (br, Ph-C1), 126.1 (Ph-C3,5), 63.6 ( $\text{OCH}_2\text{CH}_2\text{CH}_2\text{CH}_2\text{Br}$ ), 34.5 ( $\text{CH}[\text{CH}_3]_2$ ), 33.5 ( $\text{OCH}_2\text{CH}_2\text{CH}_2\text{CH}_2\text{Br}$ ), 30.4, 29.6 ( $\text{OCH}_2\text{CH}_2\text{CH}_2\text{CH}_2\text{Br}$ ), 24.0 ( $\text{CH}[\text{CH}_3]_2$ );  $^{11}\text{B}$  NMR (160.370 MHz,  $\text{C}_6\text{D}_6$ ):  $\delta$  = 28 ( $w_{1/2}$  = 550 Hz); GC-MS ( $t$  = 12.2 min):  $m/z$ : 434 [ $\text{M}^+$ ], 419 [ $\text{M}^+ - \text{CH}_3$ ], 233, 205, 135, 55 (due to partial hydrolysis on the GC-MS column an additional band for the boroxin ( $i\text{PrPhBO}$ )<sub>3</sub> is observed at a higher retention time of 14.8 min); elemental analysis: calcd. C 47.05 H 6.27; found C 46.65 H 6.46.

**Synthesis of 4-(Pinacolatoboryl)cumene.** A solution of pinacol (0.16 g, 1.36 mmol) in 10 ml  $\text{CH}_2\text{Cl}_2$  was added dropwise to a solution of 4-diethoxyborylcumene (0.30 g, 1.36 mmol) in 10 ml  $\text{CH}_2\text{Cl}_2$  and the mixture was stirred at room temperature for 48 h. All volatile material was removed under vacuum and the remaining solid was sublimed under high vacuum at 50-60 °C to give pinacolatoborylcumene as a white solid (0.20 g, 59% yield).  $^1\text{H}$  NMR (499.893 MHz,  $\text{CDCl}_3$ )  $\delta$  = 7.76 (d,  $^3J_{\text{HH}}$  = 8.5 Hz, 2H, Ph-H2,6), 7.25 (d,  $^3J_{\text{HH}}$  = 8.5 Hz, 2H, Ph-H3,5), 2.92

(septet,  $^3J_{\text{HH}} = 6.5$  Hz, 1H,  $\text{CH}[\text{CH}_3]_2$ ), 1.34 (s, 12H,  $\text{O}[\text{CH}_3]_2\text{CC}[\text{CH}_3]_2\text{O}$ ), 1.26 (d,  $^3J_{\text{HH}} = 6.5$  Hz, 6H,  $\text{CH}[\text{CH}_3]_2$ );  $^{13}\text{C}$  NMR (125.698 MHz,  $\text{CDCl}_3$ ):  $\delta = 152.5$  (Ph-C4), 135.2 (Ph-C2,6), 126.1 (Ph-C3,5), 83.8 ( $\text{O}[\text{CH}_3]_2\text{CC}[\text{CH}_3]_2\text{O}$ ), 34.6 ( $\text{CH}[\text{CH}_3]_2$ ), 25.1 ( $\text{O}[\text{CH}_3]_2\text{CC}[\text{CH}_3]_2\text{O}$ ), 24.1 ( $\text{CH}[\text{CH}_3]_2$ ), Ph-C1 was not resolved;  $^{11}\text{B}$  NMR (160.386 MHz,  $\text{CDCl}_3$ ):  $\delta = 31$  ( $w_{1/2} = 320$  Hz); GC-MS ( $t = 8.1$  min):  $m/z$ : 246 [ $\text{M}^+$ ], 231 [ $\text{M}^+ - \text{CH}_3$ ], 203, 160, 147, 131, 105; elemental analysis: calcd. C 73.19 H 9.42; found C 73.28 H 9.75.

**Synthesis of 4-Bis(2-thienyl)borylcumene.** To a solution of 4-dibromoborylcumene (1.00 g, 3.45 mmol) in  $\text{CH}_2\text{Cl}_2$  (10 ml) was added dropwise a solution of 2-trimethylstannylthiophene (1.70 g, 6.90 mmol) in  $\text{CH}_2\text{Cl}_2$  (10 ml). The mixture was stirred at room temperature for 2 h, and all volatile material was subsequently removed under vacuum. High vacuum distillation (145 °C,  $10^{-3}$  torr) gave compound **M-BTh** as colorless viscous oil (0.88 g, 86%).  $^1\text{H}$  NMR (499.893 MHz,  $\text{CDCl}_3$ ):  $\delta = 8.05$  (d,  $^3J_{\text{HH}} = 4.8$  Hz, 2H, Th-H3), 7.97 (d,  $^3J_{\text{HH}} = 3.5$  Hz, 2H, Th-H5), 7.90 (d,  $^3J_{\text{HH}} = 8.0$  Hz, 2H, Ph-H2,6), 7.48 (m, 4H, Th-H4 & Ph-H3,5), 3.15 (septet,  $^3J_{\text{HH}} = 7.0$  Hz, 1H,  $\text{CH}[\text{CH}_3]_2$ ), 1.49 (d,  $^3J_{\text{HH}} = 7.0$  Hz, 6H,  $\text{CH}[\text{CH}_3]_2$ );  $^{13}\text{C}$  NMR (125.698 MHz,  $\text{CDCl}_3$ ):  $\delta = 151.8$  (Ph-C4), 145.2 (br., Th-C2), 142.5 (Th-C3), 140.8 (br., Ph-C1), 137.4 (Ph-C2,6), 137.1 (Th-C5), 129.1 (Th-C4), 125.7 (Ph-C3,5), 34.4 ( $\text{CH}[\text{CH}_3]_2$ ), 24.1 ( $\text{CH}[\text{CH}_3]_2$ );  $^{11}\text{B}$  NMR (128.286 MHz,  $\text{CDCl}_3$ ):  $\delta = 55$  ( $w_{1/2} = 1000$  Hz); GC-MS ( $t = 11.5$  min):  $m/z$ : 296 [ $\text{M}^+$ ], 281 [ $\text{M}^+ - \text{CH}_3$ ], 253, 177.

**Synthesis of 4-Bis(pentafluorophenyl)borylcumene.**<sup>2,3</sup> A solution of  $[\text{CuC}_6\text{F}_5]_4(\text{toluene})_2$  (1.00 g, 0.90 mmol) in  $\text{CH}_2\text{Cl}_2$  (10 ml) was added dropwise to a solution of 4-dibromoborylcumene (0.50 g, 1.73 mmol) in 10 ml  $\text{CH}_2\text{Cl}_2$  at -78 °C. The mixture was kept stirring for 1 h at -78 °C and then allowed to slowly warm to room temperature. A solid precipitate (CuBr) formed and was removed by filtration through a fritted glass disk. All volatile material was removed under reduced pressure ( $10^{-3}$  torr) to give a sticky white solid. The spectroscopic purity of the crude product was estimated to ca. 95% by  $^1\text{H}$  and  $^{19}\text{F}$  NMR analysis. Distillation of the crude product at 100 °C under high vacuum gave a colorless viscous liquid that gradually solidified at low temperature (0.60 g, 75%).  $^1\text{H}$  NMR (399.952 MHz,  $\text{C}_6\text{D}_6$ ):  $\delta = 7.61$  (d,  $^3J_{\text{HH}} = 8.0$  Hz, 2H, Ph-H2,6), 7.13 (d,  $^3J_{\text{HH}} = 8.0$  Hz, 2H, Ph-H3,5), 2.63 (heptet,  $^3J_{\text{HH}} = 7.2$  Hz, 1H,  $\text{CH}[\text{CH}_3]_2$ ), 1.05 (d,  $^3J_{\text{HH}} = 7.2$  Hz, 6H,  $\text{CH}[\text{CH}_3]_2$ );  $^{13}\text{C}$  NMR (100.564 MHz,  $\text{C}_6\text{D}_6$ ):  $\delta = 159.4$  (Ph-C4), 146.5 (dm,  $^1J_{\text{CF}} = 250$  Hz, Ph-C2,6), 142.9 (dm,  $^1J_{\text{CF}} = 250$  Hz, Ph-C4), 140.6 (Ph-C2,6), 137.7 (dm,  $^1J_{\text{CF}} = 250$  Hz, Ph-C3,5), 127.0 (Ph-C3,5), 114.1 (m, Ph-C1), 34.9 ( $\text{CH}[\text{CH}_3]_2$ ), 23.3 ( $\text{CH}[\text{CH}_3]_2$ ), Ph-C1 not observed;  $^{19}\text{F}$  NMR (376.263 MHz,  $\text{C}_6\text{D}_6$ ):  $\delta = -130.4$  (dd,  $^3J_{\text{FF}} = 23.0$  Hz,  $^4J_{\text{FF}} = 9.2$  Hz, 4F, Ph-F2,6), -149.3 (t,  $^3J_{\text{FF}} = 23.0$  Hz, 2F, Ph-F4), -161.3 (dt,  $^3J_{\text{FF}} = 23.0$  Hz,  $^4J_{\text{FF}} = 9.2$  Hz, 4F, Ph-F3,5);  $^{11}\text{B}$  NMR (160.370 MHz,  $\text{C}_6\text{D}_6$ ):  $\delta = 62$  ( $w_{1/2} = 1,100$  Hz); GC-MS ( $t = 10.1$  min):  $m/z$ : 464 [ $\text{M}^+$ ], 449 [ $\text{M}^+ - \text{CH}_3$ ], 326 [ $\text{M}^+ - \text{cumene-F}$ ], 277; elemental analysis: calcd. F 40.93; found F 40.46.

## Additional References

- (1) Eaborn, C. *J. Chem. Soc.* **1956**, 4858.
- (2) For the related phenylbis(pentafluorophenyl)borane see: Deck, P. A.; Beswick, C. L.; Marks, T. J. *J. Am. Chem. Soc.* **1998**, *120*, 1772.
- (3) For the reactivity of  $[\text{CuC}_6\text{F}_5]_4(\text{toluene})_2$  toward boron halides see: Sundararaman, A.; Jäkle, F. *J. Organomet. Chem.* **2003**, *681*, 134.
